# Supplementary material for: Whey Improves In Vitro Endothelial Mitochondrial Function and Metabolic Redox Status in Diabetic State
Source: MDPI journal article supplement (doi:10.3390/antiox12061311), 2023-06-20
Supplement: s1 [file s1]

# Whey improves in vitro endothelial mitochondrial function and metabolic redox status in diabetic state

Elisa Martino<sup>1,†</sup>, Amalia Luce<sup>1,†</sup>, Anna Balestrieri<sup>2</sup>, Luigi Mele<sup>3</sup>, Camilla Anastasio<sup>1</sup>, Nunzia D’Onofrio<sup>1</sup>, Maria Luisa Balestrieri<sup>1,\*</sup>, Giuseppe Campanile<sup>4</sup>

<sup>1</sup> Department of Precision Medicine, University of Campania Luigi Vanvitelli, Via L. De Crecchio 7, 80138 Naples, Italy; elisa.martino@unicampania.it (E.M.), amalia.luce@unicampania.it (A.L.), camilla.anastasio@unicampania.it (C.A.), nunzia.donofrio@unicampania.it (N.D.).

<sup>2</sup> Food Safety Department, Istituto Zooprofilattico Sperimentale del Mezzogiorno, Portici, Italy; anna.balestrieri@izsmportici.it (A.B.).

<sup>3</sup> Department of Experimental Medicine, University of Campania Luigi Vanvitelli, Via Luciano Armanni 5, 80138 Naples, Italy; luigi.mele@unicampania.it (L.M.).

<sup>4</sup> Department of Veterinary Medicine and Animal Production, University of Naples Federico II, Naples, Italy; giuseppe.campanile@unina.it (G.C.).

\* Correspondence: marialuisa.balestrieri@unicampania.it; Tel.: +39-081-566-5865

† These authors contributed equally to this work.

## SUPPLEMENTARY MATERIALS

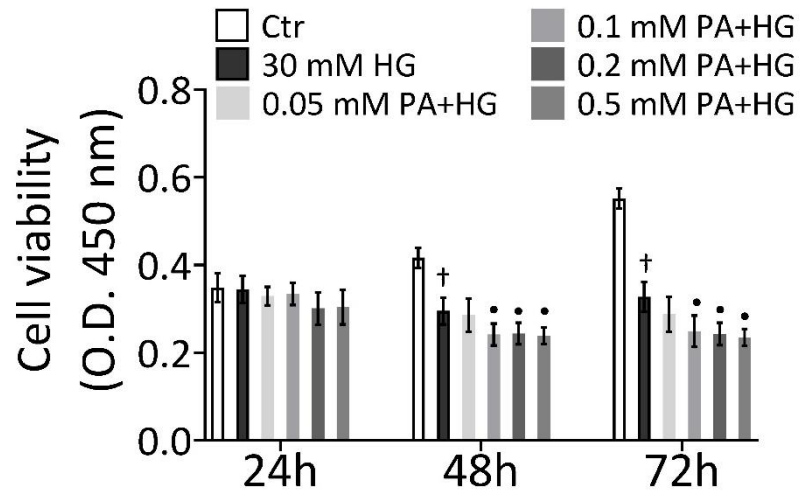

**Figure S1.** Dose- and time-response of PA on HG-cells. EC viability following exposure for 24, 48 and 72h to different doses of PA in EC stimulated with HG (30mM). Data are reported as mean  $\pm$  SD of  $n = 3$  independent experiments. † $p < 0.01$  vs. Ctr; • $p < 0.05$  vs. HG.

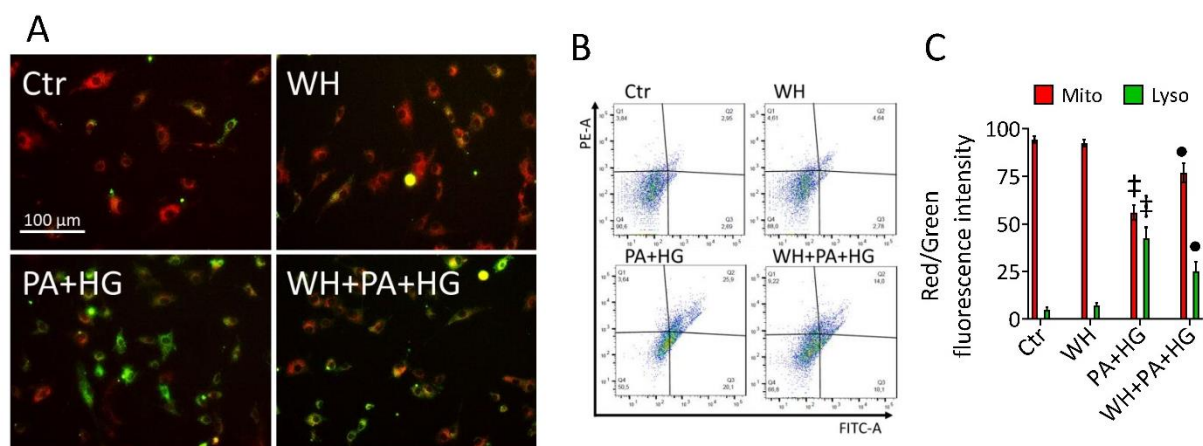

**Figure S2.** Whey effects on PA+HG-induced mitophagy. (A) Representative fluorescent images and (B,C) FACS analysis of intact mitochondria (red) and lysosome (green) stains. Scale bars = 100  $\mu$ m. Data are reported as mean  $\pm$  SD of n = 3 independent experiments.  $\ddagger$ p<0.001 vs. Ctrl;  $\bullet$ p<0.05 vs. PA+HG.

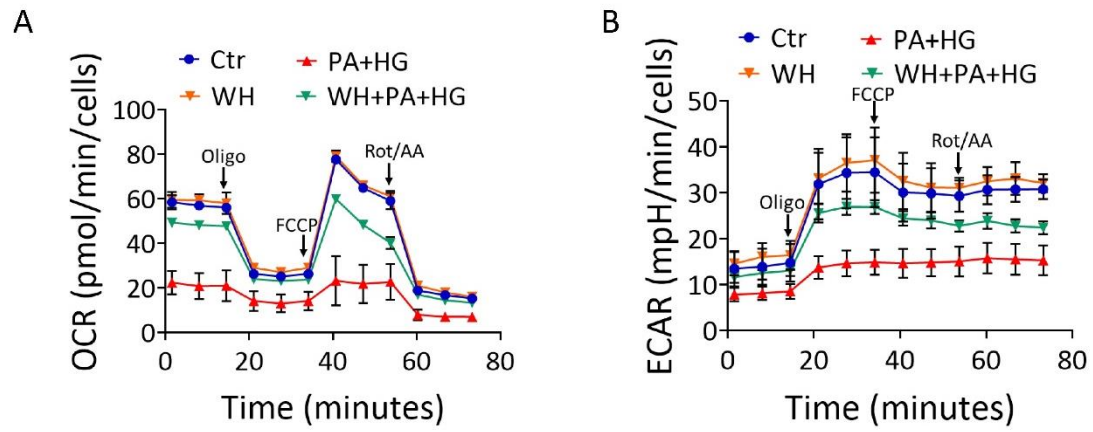

**Figure S3.** *Whey effects on mitochondrial respiration.* (A) Oxygen consumption rate (OCR) and (B) extracellular acetylation rate (ECAR) assessed with Seahorse analyzer in EC treated cells.

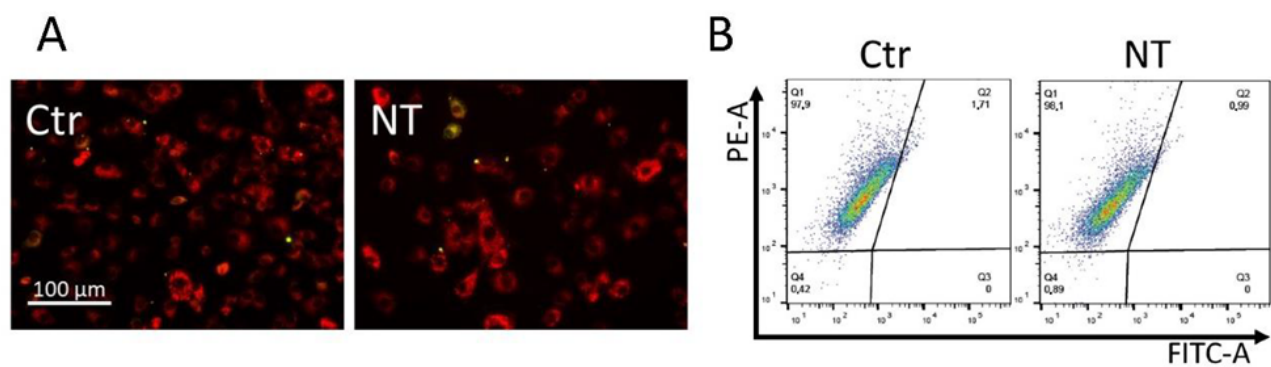

**Figure S4.** *Mitochondrial membrane polarization controls.* (A) Representative fluorescent images and (B) FACS analysis of mitochondrial membrane potential of EC transfected with non-targeting siRNA control (NT) or not transfected (Ctr). Scale bars = 100  $\mu\text{m}$ .

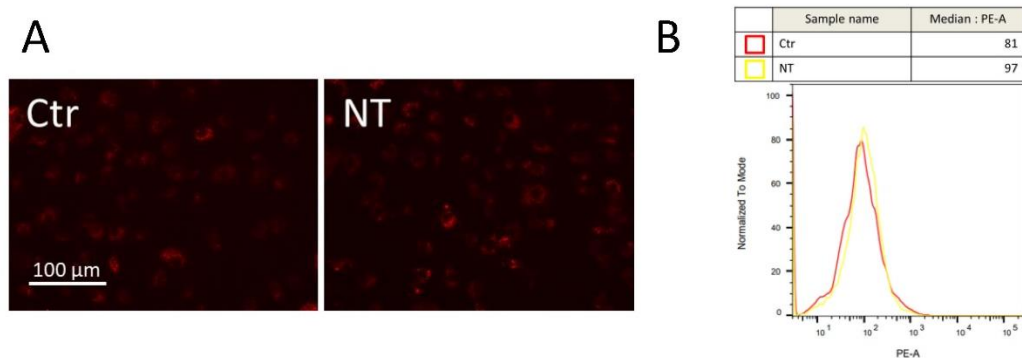

**Figure S5.** *Mitochondrial ROS controls.* (A) Representative fluorescent images and (B) FACS analysis of mitochondrial ROS levels assessed in EC transfected with non-targeting siRNA control (NT) or not transfected (Ctr). Scale bars = 100  $\mu$ m.
